# Supplementary material for: Effect of Novel Gastro-Duodenal Flow Restrictor on Relative Weight Loss and Glucose Levels in a Porcine Model: A Pilot Randomized Study
Source: MDPI journal article supplement (doi:10.3390/nu14132563), 2022-06-21
Supplement: s1 [file s1]

## Supplementary Legends

**Supplementary Figure S1.** Line graphs showing the percentages of relative weight loss in the control group compared to case porcine groups (placement of G-DFR for 28 days = 1, placement of G-DFR for 42 days = 1, placement of G-DFR for 60 days = 1, and placement of G-DFR for 90 days = 1). The relative weight loss in the control group compared to the case group on days 70 (98.9 vs. 42.1,  $p = 0.013$ ) and 90 (140.6 vs. 85.2,  $p = 0.017$ ) was significantly different. G-DFR, Gastro-duodenal flow restrictor.

**Supplementary Figure S2.** Bar graphs representing the differences in ghrelin hormone levels between the control and case groups (60 days of G-DFR placement = 1 and 90 days of G-DFR placement = 1) by observation time. The ghrelin hormone level was significantly different between the control and case groups on days three ( $p = 0.030$ ) and 28 ( $p = 0.012$ ) after the placement of G-DFR. G-DFR, Gastro-duodenal flow restrictor.

**Supplementary Figure S3.** Biochemical examination results showing alanine aminotransferase (left) and cholesterol (right) levels in the porcine study (three in control group and two in case group [60 days of G-DFR placement = 1, 90 days of G-DFR placement = 1]). G-DFR, Gastro-duodenal flow restrictor.

**Supplementary Figure S4.** Endoscopic evaluation for porcine stomach (left) and proximal duodenum (right) following distal migration of G-DFR.

**Supplementary Figure S5.** A woven metallic wire of G-DFR before coating with PTFE of measured length.

**Supplementary Video S1.** When the flow of gastroduodenal fluid in G-DFR was evaluated, injected contrast slowly ran through distal PTFE skirt of G-DFR after placement of G-DFR
